# Supplementary material for: A thermally activated delayed fluorescence exciplex to achieve highly efficient and stable blue and green phosphorescent organic light-emitting diodes
Source: Royal Society of Chemistry journal article supplement (doi:10.1039/c9ra02875g), 2019-01-01

## Supporting information

### Thermally Activated Delayed Fluorescence Exciplex to Achieve Highly Efficient and Stable Blue and Green Phosphorescent Organic Light-Emitting Diodes

Dehai Dou,<sup>a,b,‡</sup> Peng Wu,<sup>a,‡</sup> Zhangcheng Liao,<sup>a,b</sup> Jian Hao,<sup>b</sup> Jianhua Zhang,<sup>a</sup> Zixing Wang<sup>a\*</sup>

<sup>a</sup> Key Laboratory of Advanced Display and System Applications, Ministry of Education, Shanghai University, Shanghai, 200072, China.

<sup>b</sup> Department of Chemistry, Shanghai University, 99 Shangda Rd, Shanghai, 200444, China.

Corresponding Author

\*E-mail: zxwang78@shu.edu.cn

‡These authors equally contributed to this work.

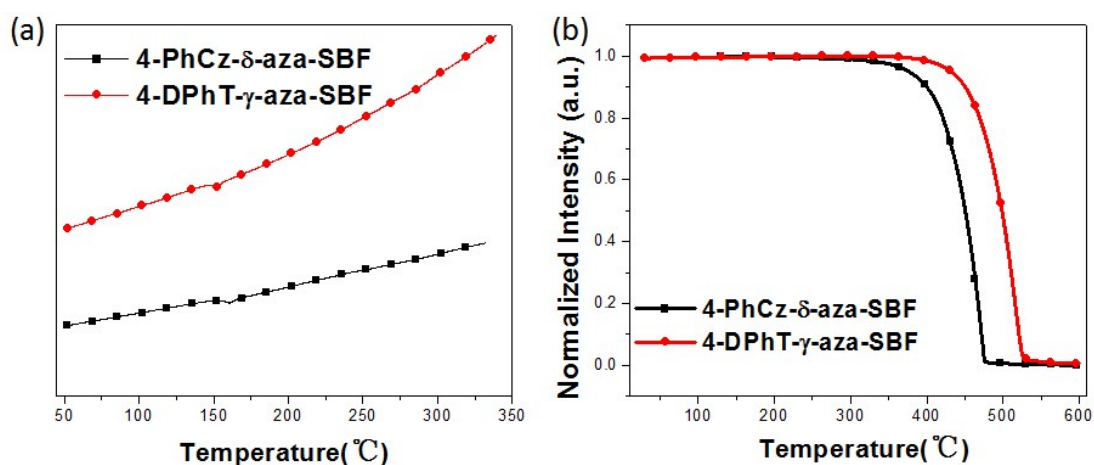

**Figure S1.** (a) DSC curves of 4-PhCz- $\delta$ -aza-SBF and 4-DPhT- $\gamma$ -aza-SBF. (b) TGA curves of 4-PhCz- $\delta$ -aza-SBF and 4-DPhT- $\gamma$ -aza-SBF.

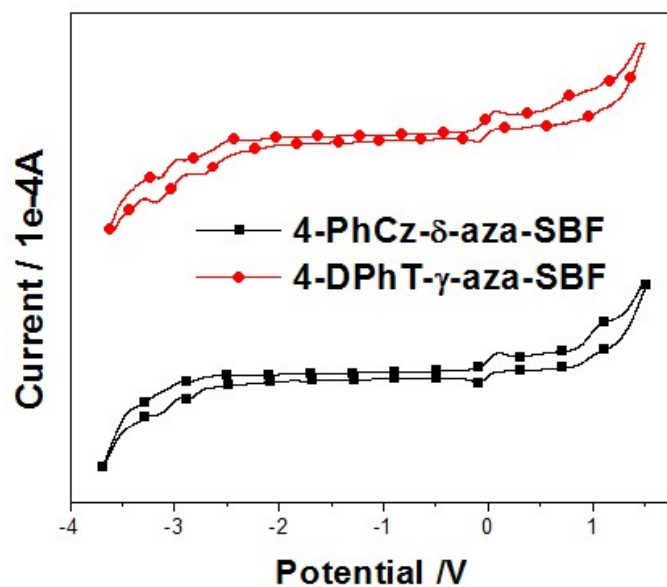

**Figure S2.** Cyclic voltammograms curves of 4-PhCz- $\delta$ -aza-SBF and 4-DPhT- $\gamma$ -aza-SBF in DMF solution.

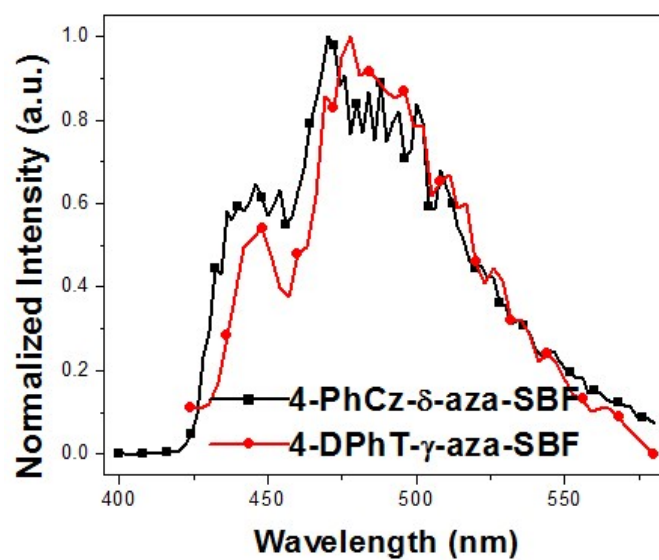

**Figure S3.** PL spectra of 4-PhCz- $\delta$ -aza-SBF and 4-DPhT- $\gamma$ -aza-SBF at 77 K

# $^1\text{H}$ NMR and $^{13}\text{C}$ NMR

## Compound 4-PhCz- $\delta$ -aza-SBF

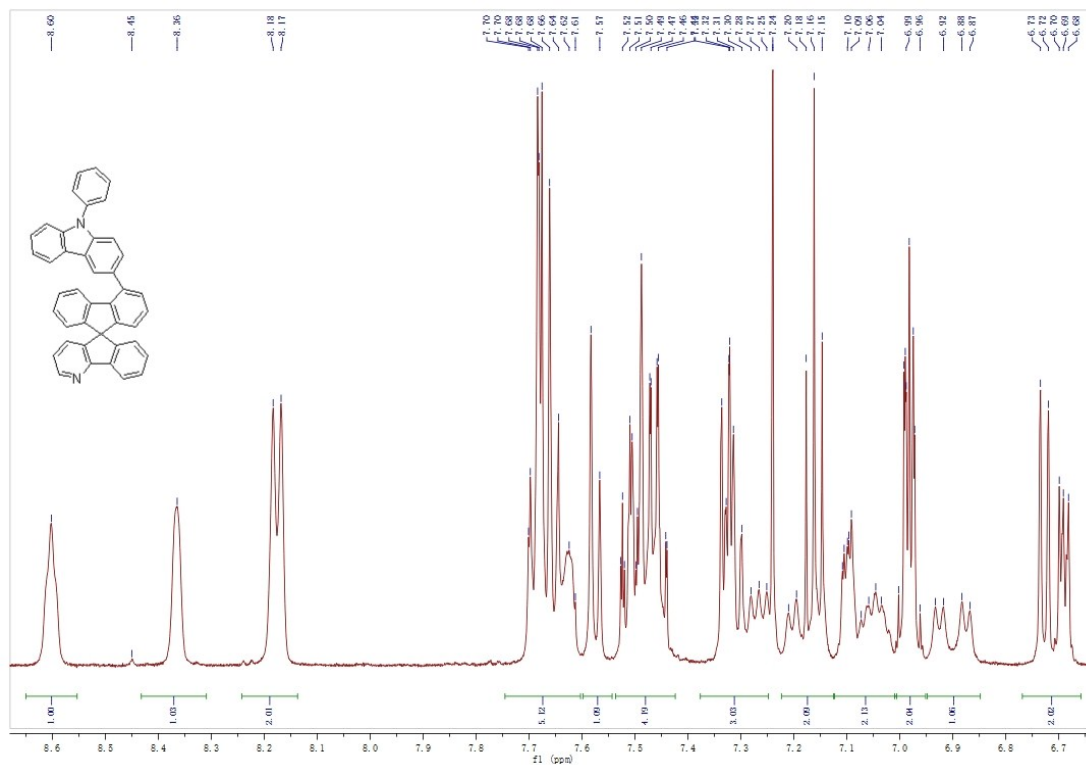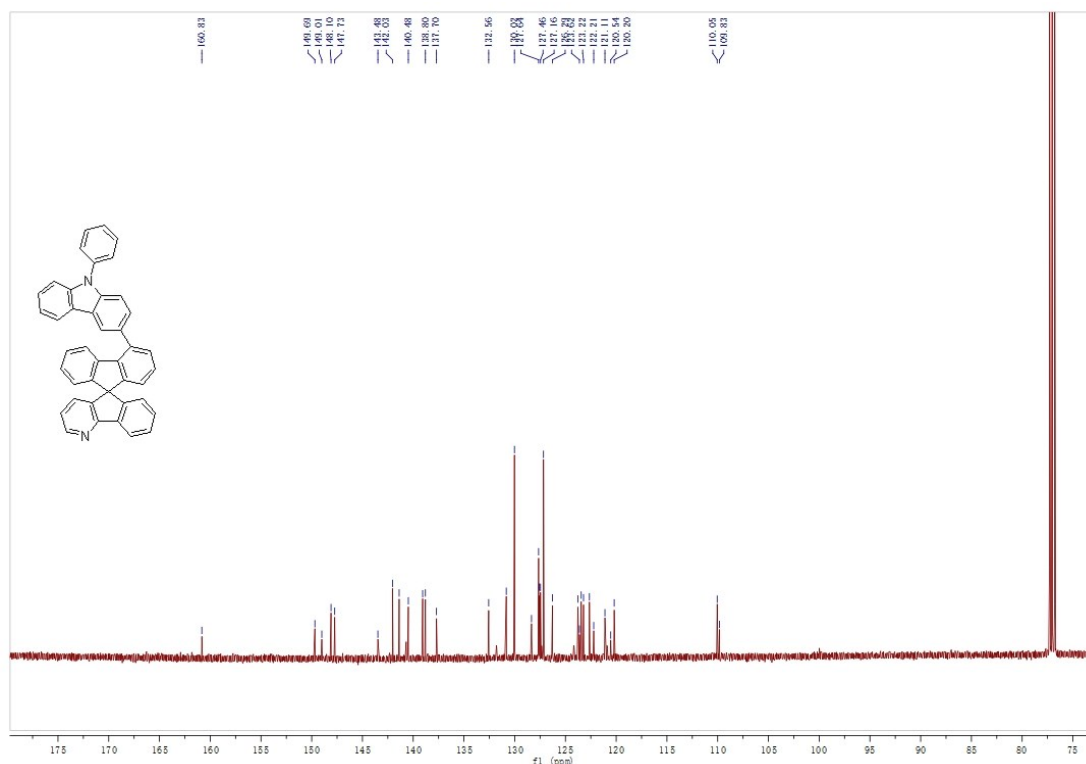

# Compound 4-DPhT- $\gamma$ -aza-SBF

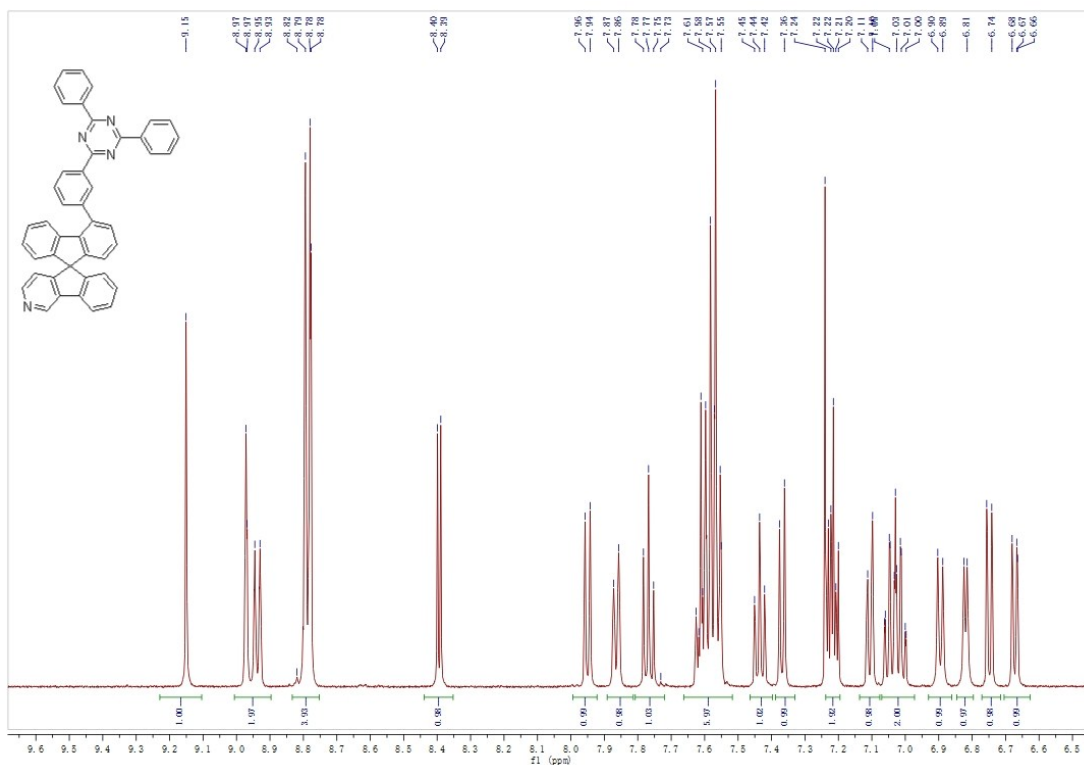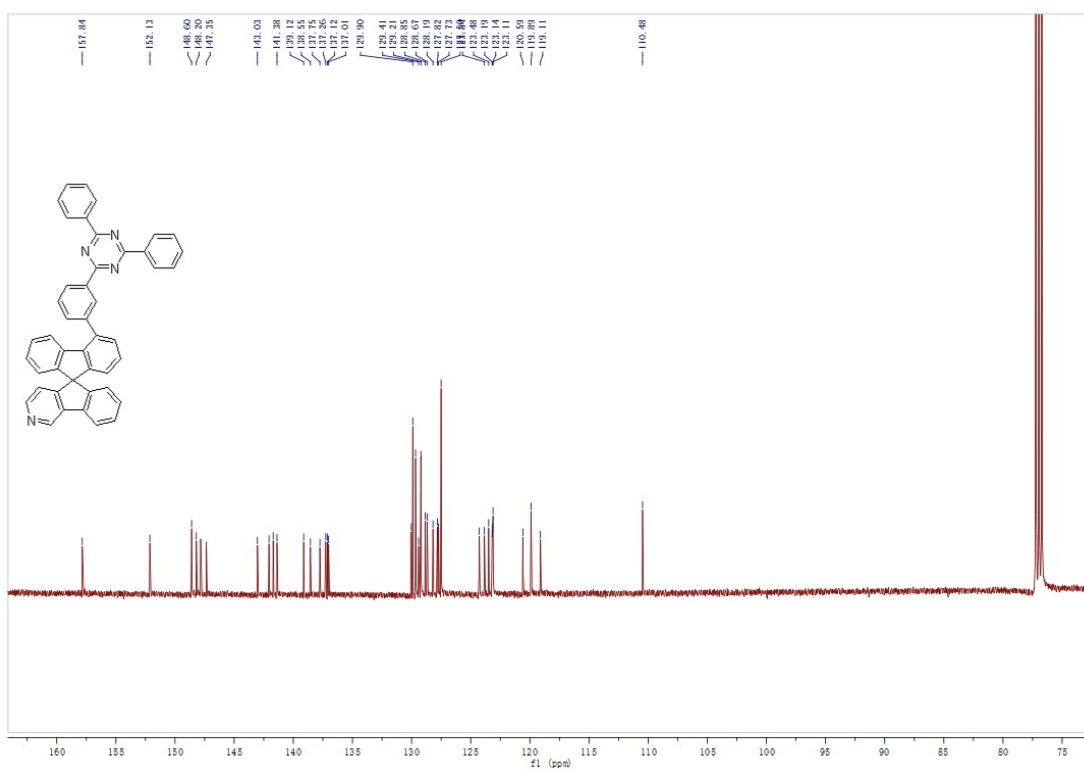

Supplement: c9ra02875g1.pdf [file c9ra02875g1.pdf]
